# Supplementary material
Source: MDPI journal article supplement (https://www.mdpi.com/2673-4540/2/4/17)
Supplement: s1 [file s1]

**Table S1.** Fasting blood glucose, insulin levels and heart to body weight ratio of nondiabetic and diabetic adult rats exposed to CDD.

| Groups         | Blood glucose<br>(mg/dL)               | Plasma insulin<br>( $\mu$ U/mL)  | Heart weight<br>(g) | Ratio (h/w)         |
|----------------|----------------------------------------|----------------------------------|---------------------|---------------------|
| <b>Control</b> | 142.17 $\pm$ 13.61                     | 6.17 $\pm$ 0.79 <sup>#</sup>     | 1.26 $\pm$ 0.20     | 0.0029 $\pm$ 0.0003 |
| <b>DM</b>      | 378.5 $\pm$ 53.73 <sup>***,†††</sup>   | 5.07 $\pm$ 0.53 <sup>†</sup>     | 0.998 $\pm$ 0.01    | 0.0027 $\pm$ 0.0001 |
| <b>CD</b>      | 145.17 $\pm$ 17.38                     | 6.13 $\pm$ 0.75                  | 1.136 $\pm$ 0.14    | 0.0029 $\pm$ 0.0002 |
| <b>DM+CD</b>   | 461.5 $\pm$ 79.39 <sup>#,***,†††</sup> | 4.64 $\pm$ 0.43 <sup>**,††</sup> | 1.003 $\pm$ 0.10    | 0.0030 $\pm$ 0.0001 |

Data refers as mean  $\pm$  SD of fasting blood glucose and fasting plasma insulin levels along to heart weight and the ratio of heart weight to the body weight of non-diabetic and diabetic adult rats after a five-week exposure to CDD. Statistical significance: \*\* $p$ <0.01; \*\*\* $p$ <0.001 compared to Control. †††:  $p$ <0.001 compared to CD group. #:  $p$ <0.05 compared to DM group. Where no sign, no significant difference among the groups. CDD: choline-deficient diet; CD: choline deprived group; DM: diabetic group; DM+CD: diabetic rats exposed to CDD; g: gram; mg/dL: milligram to decilitre;  $\mu$ U/mL: micro-unite to millilitre; h/w: the ratio of heart weight to body weight.
